# Supplementary material for: Mechanistic and Evolutionary Insights from the Reciprocal Promiscuity of Two Pyridoxal Phosphate-dependent Enzymes
Source: PubMed Central journal article supplement (PMC5025676; doi:10.1074/jbc.m116.739557), 2016-07-29

# Mechanistic and Evolutionary Insights from the Reciprocal Promiscuity of Two Pyridoxal Phosphate-Dependent Enzymes

Valerie W. C. Soo, Yuliana Yosaatmadja, Christopher J. Squire, and Wayne M. Patrick

## SUPPLEMENTAL TABLES

**Table S1.** Days to form colonies for various *E. coli* strains grown on M9/glucose medium, supplemented with IPTG (50  $\mu$ M).

| Over-expressed protein | $\Delta metC$ | $\Delta metC$ + L-methionine | $\Delta metE$ | $\Delta metE$ + L-methionine |
|------------------------|---------------|------------------------------|---------------|------------------------------|
| CBL                    | 1–2           | 1–2                          | NT*           | NT*                          |
| None (empty vector)    | No growth     | 1–2                          | No growth     | 2                            |
| ALR-GFP                | 5–6           | NT*                          | NT*           | NT*                          |
| ALR                    | 3–4           | 1–2                          | No growth     | 2                            |
| Methionine synthase    | NT*           | NT*                          | 2             | 2                            |

\*NT: Not tested.

**Table S2.** Crystal properties, data collection and refinement statistics.

|                                           | ALR(Y274F)                  | ALR(Y274F)<br>+ L-Ala-P     | CBL(P113S)                  | CBL(P113S)<br>+ L-Ala-P     |
|-------------------------------------------|-----------------------------|-----------------------------|-----------------------------|-----------------------------|
| <b>PDB entry</b>                          | 4WR3                        | 4XBJ                        | 4ITG                        | 4ITX                        |
| <b>Data collection</b>                    |                             |                             |                             |                             |
| Space group                               | <i>P6</i>                   | <i>P6</i>                   | <i>C222</i> <sub>1</sub>    | <i>C222</i> <sub>1</sub>    |
| Unit-cell parameters:                     |                             |                             |                             |                             |
| <i>a</i> (Å)                              | 148.08                      | 147.98                      | 59.93                       | 59.97                       |
| <i>b</i> (Å)                              | 148.08                      | 147.98                      | 152.77                      | 153.22                      |
| <i>c</i> (Å)                              | 163.69                      | 163.58                      | 150.85                      | 150.91                      |
| $\alpha, \beta, \gamma$ (°)               | 90, 90, 120                 | 90, 90, 120                 | 90, 90, 90                  | 90, 90, 90                  |
| Beamline                                  | Rotating anode              | Rotating anode              | Rotating anode              | Rotating anode              |
| Resolution                                | 1.86 (1.90-1.86)            | 2.25 (2.29-2.25)            | 1.74 (1.83-1.74)            | 1.61 (1.69-1.61)            |
| Wavelength (Å)                            | 1.5418                      | 1.5418                      | 1.5418                      | 1.5418                      |
| CC <sub>1/2</sub>                         | 0.998 (0.632)               | 0.992 (0.617)               | 1.000 (0.976)               | 1.000 (0.881)               |
| Completeness (%)                          | 99.6 (93.8)                 | 99.7 (97.0)                 | 99.7 (98.3)                 | 99.0 (93.7)                 |
| Observed reflections                      | 168,143                     | 95,615                      | 71,753                      | 89,828                      |
| $\langle I/\sigma(I) \rangle$             | 18.5 (1.9)                  | 10.7 (2.0)                  | 35.7 (8.7)                  | 25.6 (4.2)                  |
| Multiplicity                              | 22.1 (16.4)                 | 11.4 (10.2)                 | 15.9 (14.8)                 | 11.6 (9.7)                  |
| <b>Refinement</b>                         |                             |                             |                             |                             |
| Resolution range                          | 19.7-1.90                   | 19.9-2.25                   | 19.5-1.74                   | 76.6-1.61                   |
| Reflections used                          | 149,471                     | 90,731                      | 67,348                      | 85,255                      |
| <i>R</i> factor                           | 0.175                       | 0.167                       | 0.164                       | 0.164                       |
| <i>R</i> <sub>free</sub>                  | 0.204                       | 0.202                       | 0.203                       | 0.199                       |
| Average <i>B</i> factor (Å <sup>2</sup> ) | 22.8                        | 21.7                        | 16.5                        | 16.2                        |
| RMS deviation from ideal:                 |                             |                             |                             |                             |
| Bond lengths (Å)                          | 0.008                       | 0.008                       | 0.020                       | 0.022                       |
| Bond angles (°)                           | 1.349                       | 1.142                       | 2.126                       | 2.157                       |
| Ramachandran plot (%):                    |                             |                             |                             |                             |
| Favoured                                  | 96.8                        | 96.2                        | 97.2                        | 97.8                        |
| Outliers                                  | 0.0                         | 0.0                         | 0.0                         | 0.0                         |
| Molprobrity server score                  | 93 <sup>rd</sup> percentile | 96 <sup>th</sup> percentile | 93 <sup>rd</sup> percentile | 94 <sup>th</sup> percentile |

Data for the high resolution shell are shown in parentheses.

## SUPPLEMENTAL FIGURE

**Figure S1.** 2Fo – Fc electron density maps of the PLP sites in ALR(Y274F), ALR(Y27F)–L-Ala-P, CBL(P113S) and CBL(P113S)–L-Ala-P. Each map is contoured at 1 $\sigma$ .

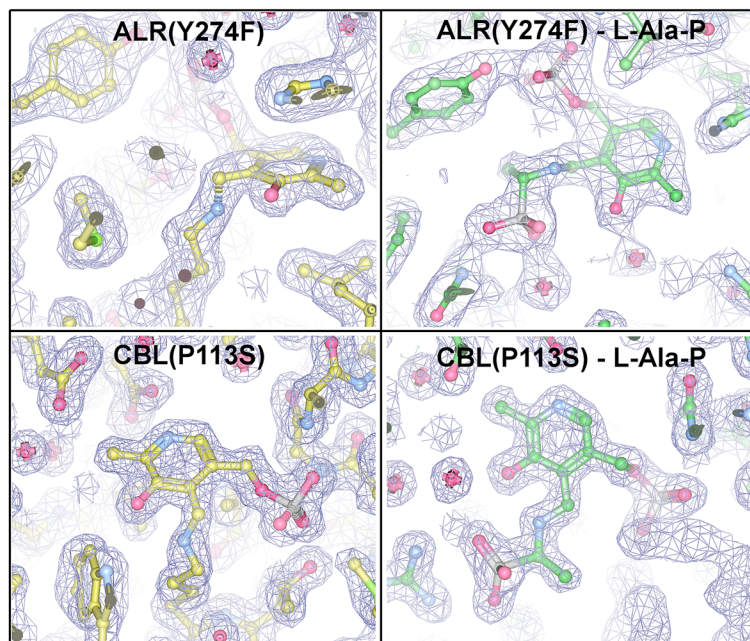

Supplement: 10.1074_M116.739557_jbc.M116.739557-1.pdf [file 10.1074_M116.739557_jbc.M116.739557-1.pdf]
